# Supplementary material for: Diagnostic Accuracy of Digital Solutions for Screening for Cognitive Impairment: A Systematic Review and Meta-Analysis
Source: MDPI journal article supplement (doi:10.3390/app14062640), 2024-03-21
Supplement: s1 [file s1]

**Table S1.** Characteristics of the included studies.

| Study<br>(authors,<br>year)          | Participants            |                                                             |                                                |                                                                      | Reference Standard                                                                                                                                      |                                                                                                                                                                                      | Index Test<br>(Digital Solution)                                                          |                               |                                      |
|--------------------------------------|-------------------------|-------------------------------------------------------------|------------------------------------------------|----------------------------------------------------------------------|---------------------------------------------------------------------------------------------------------------------------------------------------------|--------------------------------------------------------------------------------------------------------------------------------------------------------------------------------------|-------------------------------------------------------------------------------------------|-------------------------------|--------------------------------------|
|                                      | Target<br>condition     | Sample size                                                 | Age                                            | Gender                                                               | Name                                                                                                                                                    | Name<br>(description)                                                                                                                                                                | Domain                                                                                    | Type                          | Results                              |
| <b>Curriel et al. (2016)</b>         | MCI                     | n = 98<br><br>CN (n = 64)<br>MCI (n = 34)                   | CN - 74 (7)<br>MCI - 78 (6)                    | F - 74 / M - 24                                                      | Clinical assessment protocol, CDR, MMSE, Neuropsychological test battery                                                                                | MITSL-L<br>(incorporate a novel paradigm that maximizes semantic interference effects by binding and unbinding semantic associations)                                                | Semantic memory                                                                           | Innovative digital solutions  | Sensitivity 0.85<br>Specificity 0.84 |
| <b>Alegret et al. (2020)</b>         | MCI<br>(naMCI;<br>aMCI) | n = 276<br><br>CH (n = 154)<br>MCI (naMCI / aMCI) (n = 122) | CH - 68 (8)<br>naMCI - 66 (9)<br>aMCI - 68 (8) | CH - 61 (39.61)<br>M / naMCI - 19 (31.15) M /<br>aMCI - 23 (37.70) M | NBACE, neurological history and examination, a semi-structured psychosocial interview, including assessment by the BDRS                                 | FACEmemory®<br>(self-administered computerized version of the FNAME-12, a validated paper and pencil test, with images, names, and occupations)                                      | Memory                                                                                    | Paper-based digital solutions | Sensitivity 0.73<br>Specificity 0.72 |
| <b>Kokubo et al. (2018)</b>          | MCI & D                 | n = 53<br><br>HC (n = 29)<br>MCI&D (n = 24)                 | HC - 56 (14)<br>PD - 69 (7)<br>MCI&D - 80 (8)  | HC - 11M 18F /<br>PD - 13M 15F /<br>MCI&D - 13M 11F                  | Diagnostic by professionals                                                                                                                             | UX-TMT<br>(modified trail making test, inspired by the Advanced Trail Making Test, Stroop test, and Reverse Stroop test)                                                             | Visuospatial working memory, executive function, interference inhibition quantitatively   | Paper-based digital solutions | Sensitivity 0.83<br>Specificity 0.91 |
| <b>Rhodius-Meester et al. (2020)</b> | MCI                     | n = 278<br><br>CN (n = 195)<br>MCI (n = 83)                 | CN - 64 (9)<br>MCI - 71(7)                     | CN - F66%<br>M34% / MCI<br>F37% M63%                                 | Standard Neuropsychological tests (MMSE, RAVLT or CERAD word list memory task, TMT-A, TMT-B, categorical (animals) verbal fluency, and digit span test) | cCOG<br>(developed based on traditional cognitive tests, based on the three classical cognitive tasks: a modification of wordlist test, simple reaction task, and Trail Making Test) | Episodic memory, attention, reaction, visuomotor speed, attention, and executive function | Paper-based digital solutions | Sensitivity 0.77<br>Specificity 0.77 |
| <b>Ichii et al. (2019)</b>           | MCI                     | n = 224<br><br>Normal (n = 121)<br>MCI (n = 103)            | Normal - 77 (7)<br>MCI - 81 (6)                | Normal<br>F107<br><br>MCI<br>F95                                     | MMSE                                                                                                                                                    | CogEvo<br>(newly developed computer-aided neuropsychiatric battery that uses a touch panel consisting of five basic tasks to evaluate the cognitive domains)                         | Orientation, visual attention, memory, executive function and spatial cognition           | Innovative digital solutions  | Sensitivity 0.78<br>Specificity 0.54 |
| <b>Wong et al. (2017)</b>            | CI                      | n = 160<br><br>CN (n = 101)<br>CI (n = 59)                  | CN - 71 (9)<br>CI - 78 (8)                     | CN - F78,2%<br>21,8%M<br>CI - F76,3%<br>23,7%M                       | MoCA                                                                                                                                                    | CoCoSc<br>(developed from inception by experts, it is a fully automated, self-administered test containing six subtests covering five cognitive domains)                             | Memory, executive function, orientation, attention, working memory and prospective memory | Innovative digital solutions  | Sensitivity 0.78<br>Specificity 0.69 |

| Study<br>(authors,<br>year)  | Participants        |                                                |                             | Reference Standard                        |                                                                                                                                                                               | Index Test<br>(Digital Solution)                                                                                                                                                                 |                                                                                                                                                   |                               |                                      |
|------------------------------|---------------------|------------------------------------------------|-----------------------------|-------------------------------------------|-------------------------------------------------------------------------------------------------------------------------------------------------------------------------------|--------------------------------------------------------------------------------------------------------------------------------------------------------------------------------------------------|---------------------------------------------------------------------------------------------------------------------------------------------------|-------------------------------|--------------------------------------|
|                              | Target<br>condition | Sample size                                    | Age                         | Gender                                    | Name                                                                                                                                                                          | Name<br>(description)                                                                                                                                                                            | Domain                                                                                                                                            | Type                          | Results                              |
| <b>Buckley et al. (2017)</b> | SCI                 | n = 50<br><br>TP (n = 37)<br>SCI (n = 13)      | 69 (8)                      | F:62%; M:38%                              | PACC                                                                                                                                                                          | NIH Toolbox Cognition Battery / Cogstate-C3 (based on the NIH Toolbox Cognition Battery and on the original Cogstate Brief Battery)                                                              | Multidomain                                                                                                                                       | Paper-based digital solutions | Sensitivity 0.62<br>Specificity 0.81 |
| <b>Memória et al. (2014)</b> | MCI                 | n = 76<br><br>NC (n = 41)<br>MCI (n = 35)      | NC - 72 (5)<br>MCI - 74 (6) | NC<br>F 33/41<br>MCI<br>F 27/35           | Medical, neuropsychological, laboratorial, and neuroimaging data, MMSE, Peterson Criteria                                                                                     | CANS-MCI (including adaptation on traditional tests is a computer-based cognitive screening test that incorporates automated administration and scoring and immediate analyses of test sessions) | Executive function, language fluency and memory                                                                                                   | Paper-based digital solutions | Sensitivity 0.80<br>Specificity 0.73 |
| <b>Ke Yu et al. (2015)</b>   | MCI                 | n = 118<br><br>NC (n = 55)<br>MCI (n = 63)     | NC - 72 (5)<br>MCI - 74 (5) | NC<br>F 13 (13/55)<br>MCI<br>F 18 (18/63) | Criteria established by Peterson                                                                                                                                              | MoCA-CC computerized tool based on the Beijing version of MoCA (MoCA-BJ)                                                                                                                         | Attention and concentration, executive function, memory, language, visuoconstructional skills, conceptual thinking, calculation, and orientation. | Paper-based digital solutions | Sensitivity 0.95<br>Specificity 0.87 |
| <b>Scharre et al. (2017)</b> | MCI                 | n = 45<br><br>Normal (n = 21)<br>MCI (n = 24)  | 75 (7)                      | Total<br>F= 67%                           | Standard clinical assessment and neuropsychological evaluation (MMSE, WCST, SAGE, MOCA, HVLTL, WAIS III subscales, Boston Naming Test, FAS verbal fluency test)               | eSAGE (digital version of the original paper Self-Administered Gerocognitive Examination (SAGE))                                                                                                 | Orientation, language, memory, executive function, abstraction, calculations and visuospatial abilities                                           | Paper-based digital solutions | Sensitivity 0.62<br>Specificity 0.81 |
| <b>Tierney et al. (2014)</b> | CI                  | n = 259<br><br>Normal (n = 204)<br>CI (n = 55) | --                          | --                                        | Battery of standardized neuropsychological tests to provide an independent reference Standard (subtests of HVLTL, TMT-A, TMT-B, Clock Drawing Test)                           | CAMCI (includes traditional paper and pencil tests modified to allow computer administration and response)                                                                                       | Attention, executive function, processing speed, verbal memory, nonverbal memory, functional memory, and incidental memory                        | Paper-based digital solutions | Sensitivity 0.80<br>Specificity 0.74 |
| <b>Brandt et al. (2014)</b>  | MCI                 | n = 24<br><br>Normal (n = 20)<br>MCI (n = 4)   | --                          | --                                        | Complete histories, neurological and psychiatric examinations (including MMSE), blood laboratory studies, EEG, brain imaging, and comprehensive neuropsychological assessment | DRA (online tool, consists of questions about risk factors for dementia, a verbal memory test, and an informant report of cognitive decline.)                                                    | History of health risk factors (including 12 neurological conditions, and 2 psychological disorders); associative memory                          | Paper-based digital solutions | Sensitivity 0.80<br>Specificity 0.75 |

| Study<br>(authors,<br>year)        | Participants        |                                                                                                                                      |                                                                                                                  | Reference Standard                                                                                                  |                                                                                                                                                                                                                             | Index Test<br>(Digital Solution)                                                                                                                                                                                                  |                                                                                                                               |                               |                                      |
|------------------------------------|---------------------|--------------------------------------------------------------------------------------------------------------------------------------|------------------------------------------------------------------------------------------------------------------|---------------------------------------------------------------------------------------------------------------------|-----------------------------------------------------------------------------------------------------------------------------------------------------------------------------------------------------------------------------|-----------------------------------------------------------------------------------------------------------------------------------------------------------------------------------------------------------------------------------|-------------------------------------------------------------------------------------------------------------------------------|-------------------------------|--------------------------------------|
|                                    | Target<br>condition | Sample size                                                                                                                          | Age                                                                                                              | Gender                                                                                                              | Name                                                                                                                                                                                                                        | Name<br>(description)                                                                                                                                                                                                             | Domain                                                                                                                        | Type                          | Results                              |
| <b>Van Mierlo et al. (2017)</b>    | MCI                 | n = 61                                                                                                                               | SCD - 62 (7)                                                                                                     | SCD - F16 (47%)                                                                                                     | Clinical history, medical and neurological examination, screening laboratory tests, MRI, EEG, neuropsychological assessment (MMSE, WAIS-III, TMT, Stroop test, Visual association test, Auditory Verbal Learning Test), GDS | Online and telephone-based automated self-tests of cognitive function (based on the Telephonic Remote Evaluation of Neuropsychological Deficits (TREND), the content was expanded by incorporating visual and visuospatial tasks) | Cognitive function - screening for MCI and dementia                                                                           | Paper-based digital solutions | Sensitivity 0.75<br>Specificity 0.79 |
|                                    |                     | SCD (n = 33)<br>MCI (n = 28)                                                                                                         | MCI - 66 (8)                                                                                                     | M18 (53%)<br>MCI - F9 (30%)<br>M21 (70%)                                                                            |                                                                                                                                                                                                                             |                                                                                                                                                                                                                                   |                                                                                                                               |                               |                                      |
| <b>Dougherty Jr. et al. (2010)</b> | CI (include severe) | n = 215                                                                                                                              | Control - 75 (7)                                                                                                 | Control - M41                                                                                                       | Diagnoses are based on a composite of measures: MMSE, test of executive functions, test of verbal fluency, Mini-Cog, MoCA, GDS, caregiver/family member interview, and clinical examination                                 | CST (adapted from a paper and pencil Self-Test used in the memory disorders clinic)                                                                                                                                               | Verbal fluency, visual-spatial functions, memory, attention, executive functions, and perceptual/processing speed             | Paper-based digital solutions | Sensitivity 0.99<br>Specificity 0.95 |
|                                    |                     | Control (n = 104)<br>MCI (n = 27)<br>Early AD (n = 22)<br>Mild to Moderate (n = 33)<br>Moderate to Severe (n = 24)<br>Severe (n = 5) | MCI - 67 (6)<br>Early AD - 77 (5)<br>Mild to Moderate - 75 (9)<br>Moderate to Severe - 78 (7)<br>Severe - 75 (4) | F63 / MCI - M24<br>F3 / Early AD - M6<br>F16 / Mild to Mod. - M14<br>F19 / Mod. to Sev. - M14<br>F10 / Sev. - M1 F4 |                                                                                                                                                                                                                             |                                                                                                                                                                                                                                   |                                                                                                                               |                               |                                      |
| <b>Van der Hoek et al. (2019)</b>  | MCI                 | n = 82                                                                                                                               | 84 (5)                                                                                                           | F55(67%)                                                                                                            | MoCA                                                                                                                                                                                                                        | MTX (adaptation of a continuous recognition task paradigm (CRT), CRT-based test)                                                                                                                                                  | Cognitive function, memory                                                                                                    | Paper-based digital solutions | Sensitivity 0.49<br>Specificity 0.78 |
|                                    |                     | Normal (n = 45)<br>MCI (n = 37)                                                                                                      | NC - 83 (5)<br>MCI - 85 (5)                                                                                      | M27(33%)<br>NC - F27(60%)<br>M18(40%)<br>MCI - F28(76%)<br>M9(24%)                                                  |                                                                                                                                                                                                                             |                                                                                                                                                                                                                                   |                                                                                                                               |                               |                                      |
| <b>Scanlon et al. (2015)</b>       | MCD                 | n = 60                                                                                                                               | Normal - 73 (12)                                                                                                 | F31(51.7%) M29 (48.3%); Normal - F8 M12 / D* - F23 M17                                                              | DSM-IV criteria by professional                                                                                                                                                                                             | CCS - three tasks, from Rosetta Stone (consists of three touch-screen CCS tasks, computer applications from Rosetta Stone)                                                                                                        | Concentration, memory, visuospatial functioning                                                                               | Innovative digital solutions  | Sensitivity 0.94<br>Specificity 0.60 |
| <b>Fung et al. (2020)</b>          | MCI                 | n = 606                                                                                                                              | 70 (7)                                                                                                           | F53.3% M46.7%                                                                                                       | Combined clinical and cognitive criteria (including CMMSE, CVFT, ADAS-Cog Subscale)                                                                                                                                         | HK-VMT (contains three newly developed subtests such as 16-word list learning, attention tests, and delayed matching tests)                                                                                                       | Episodic memory, attention, and visuospatial ability                                                                          | Innovative digital solutions  | Sensitivity 0.87<br>Specificity 0.75 |
|                                    |                     | HC (n = 509)<br>MCI (n = 97)                                                                                                         | HC - 69 (6)<br>MCI - 73 (7)                                                                                      | ; HC - F54.8%<br>M45.2% / MDI - F45.4% 54.6%                                                                        |                                                                                                                                                                                                                             |                                                                                                                                                                                                                                   |                                                                                                                               |                               |                                      |
| <b>Cahn-Hidalgo et al. (2020)</b>  | MD+I                | n = 92                                                                                                                               | --                                                                                                               | --                                                                                                                  | SLUMS                                                                                                                                                                                                                       | Cognivue® (computerized tool for the automated cognitive assessment that is not dependent on traditional question-and-answer testing)                                                                                             | Visuomotor ability (to calibrate the tests based on visual and motor abilities), perceptual processing, and memory processing | Innovative digital solutions  | Sensitivity 0.78<br>Specificity 0.50 |
|                                    |                     | unI (n = 46)<br>MD+I (n = 46)                                                                                                        |                                                                                                                  |                                                                                                                     |                                                                                                                                                                                                                             |                                                                                                                                                                                                                                   |                                                                                                                               |                               |                                      |

| Study<br>(authors,<br>year)            | Participants          |                                                 |                                  |                                                                      | Reference Standard                                                                                                                                                                                                                                                                                                    |                                                                                                                                                                                                                                                                                             | Index Test<br>(Digital Solution)                                                                                 |                                  |                                      |
|----------------------------------------|-----------------------|-------------------------------------------------|----------------------------------|----------------------------------------------------------------------|-----------------------------------------------------------------------------------------------------------------------------------------------------------------------------------------------------------------------------------------------------------------------------------------------------------------------|---------------------------------------------------------------------------------------------------------------------------------------------------------------------------------------------------------------------------------------------------------------------------------------------|------------------------------------------------------------------------------------------------------------------|----------------------------------|--------------------------------------|
|                                        | Target<br>condition   | Sample size                                     | Age                              | Gender                                                               | Name                                                                                                                                                                                                                                                                                                                  | Name<br>(description)                                                                                                                                                                                                                                                                       | Domain                                                                                                           | Type                             | Results                              |
| Kalafatis<br>et al. (2021)             | CI (MCI +<br>Mild AD) | n = 230                                         | HV - 67 (8)                      | HV                                                                   | Diagnoses made by a<br>professional according to<br>diagnostic criteria                                                                                                                                                                                                                                               | ICA<br>(self-administered,<br>computerized cognitive<br>assessment tool based on a<br>rapid categorization task<br>independent of language<br>uses artificial intelligence to<br>detect cognitive<br>impairment)                                                                            | Information<br>processing speed,<br>semantic processing<br>and translating this<br>into a motor response         | Innovative<br>digital solutions  | Sensitivity 0.79<br>Specificity 0.75 |
|                                        |                       | HV (n = 95)<br>MCI (n = 80)<br>mild AD (n = 55) | MCI - 70 (8)<br>Mild AD - 71 (8) | F 55.8%<br>MCI<br>F 47.5%<br>Mild AD<br>F 49.1%                      |                                                                                                                                                                                                                                                                                                                       |                                                                                                                                                                                                                                                                                             |                                                                                                                  |                                  |                                      |
| Rodríguez-<br>Salgado et<br>al. (2021) | MCI                   | n = 99                                          | Controls - 70 (6)                | Controls                                                             | Multidisciplinary consensus<br>conference by professionals<br>based on published criteria<br>using clinical assessments and<br>structural neuroimaging,<br>clinical history, physical and<br>neurological examination, a<br>functional interview including<br>CDR and a neuropsychological<br>assessment              | BHA Cuban version<br>(includes four subtests<br>based on existing clinical<br>and experimental tasks and<br>the Brain Health Survey<br>(BHS) self-administered by<br>an informant; the Cuban<br>version of the BHA test<br>appropriately reflects<br>cultural and linguistic<br>difference) | Associative memory,<br>processing speed and<br>executive function,<br>visuospatial skills,<br>and language       | Paper-based<br>digital solutions | Sensitivity 0.87<br>Specificity 0.85 |
|                                        |                       | CH (n = 53)<br>MCI (n = 46)                     | MCI - 72 (8)                     | F 39 (74%)<br>MCI<br>F 24 (52%)                                      |                                                                                                                                                                                                                                                                                                                       |                                                                                                                                                                                                                                                                                             |                                                                                                                  |                                  |                                      |
| Liu et al.<br>(2021)                   | MCI due<br>to AD      | n = 100                                         | CON - 68 (8)                     | CON                                                                  | Based on the guideline in<br>DSM-5                                                                                                                                                                                                                                                                                    | MTX<br>(adaptation of a continuous<br>recognition task paradigm<br>(CRT), CRT-based test)                                                                                                                                                                                                   | Episodic memory,<br>attention and<br>processing speed                                                            | Paper-based<br>digital solutions | Sensitivity 0.72<br>Specificity 0.84 |
|                                        |                       | CON (n = 50)<br>MCI-AD (n = 50)                 | MCI-AD - 68 (11)                 | M 30 (60%)<br>MCI-AD<br>M 24 (48%)                                   |                                                                                                                                                                                                                                                                                                                       |                                                                                                                                                                                                                                                                                             |                                                                                                                  |                                  |                                      |
| Yan et al.<br>(2021)                   | MCI                   | n = 126                                         | HC - 74 (16)                     | HC                                                                   | Petersen criteria Montreal<br>Cognitive e CDR, MMSE,<br>GDS-15, ADL, and MoCA                                                                                                                                                                                                                                         | VSP<br>(developed in line with the<br>population's cultural habits<br>using the virtual<br>supermarket and designed<br>the test with virtual reality<br>technology were shopping-<br>related tasks were used for<br>cognitive assessment)                                                   | Learning and<br>memory, executive<br>functions, language,<br>time orientation, and<br>complex attention          | Innovative<br>digital solutions  | Sensitivity 0.85<br>Specificity 0.80 |
|                                        |                       | HC (n = 64)<br>MCI (n = 62)                     | MCI - 82 (16)                    | F 13.0 (20.3)<br>M51.0 (79.7)<br>MCI<br>F22.0 (35.5)<br>M40.0 (64.5) |                                                                                                                                                                                                                                                                                                                       |                                                                                                                                                                                                                                                                                             |                                                                                                                  |                                  |                                      |
| Ye et al.<br>(2022)                    | MCI                   | n = 57                                          | NC - 68 (10)                     | NC                                                                   | Primary cognitive diagnosis<br>within the registry<br>(participants were placed into<br>the diagnostic groups based on<br>their most recent clinical<br>diagnosis available in their<br>electronic health record, or<br>based on their report of no<br>cognitive symptoms or<br>diagnosis of cognitive<br>impairment) | BrainCheck battery<br>(tablet-based version of pre-<br>existing neurocognitive tests<br>such as the Digit Symbol<br>Substitution Task, Stroop<br>Task, and Trail Making Test)                                                                                                               | Memory, executive<br>function, alertness,<br>spatial awareness,<br>visual<br>attention, cognitive<br>flexibility | Paper-based<br>digital solutions | Sensitivity 0.86<br>Specificity 0.83 |
|                                        |                       | NC (n = 35)<br>MCI (n = 22)                     | MCI - 74 (6)                     | F 25 (71%)<br>M 10 (29%)<br>MCI<br>F 8 (36%)<br>M 14 (64%)           |                                                                                                                                                                                                                                                                                                                       |                                                                                                                                                                                                                                                                                             |                                                                                                                  |                                  |                                      |

| Study<br>(authors,<br>year) | Participants        |                              |                             |                                                                   | Reference Standard                                                                                                                                                                                                                               |                                                                                                                                                                                                                                                                                                                    | Index Test<br>(Digital Solution)                                                                                                                                                                                                                  |                                  |                                      |
|-----------------------------|---------------------|------------------------------|-----------------------------|-------------------------------------------------------------------|--------------------------------------------------------------------------------------------------------------------------------------------------------------------------------------------------------------------------------------------------|--------------------------------------------------------------------------------------------------------------------------------------------------------------------------------------------------------------------------------------------------------------------------------------------------------------------|---------------------------------------------------------------------------------------------------------------------------------------------------------------------------------------------------------------------------------------------------|----------------------------------|--------------------------------------|
|                             | Target<br>condition | Sample size                  | Age                         | Gender                                                            | Name                                                                                                                                                                                                                                             | Name<br>(description)                                                                                                                                                                                                                                                                                              | Domain                                                                                                                                                                                                                                            | Type                             | Results                              |
| Paterson et<br>al. (2022)   | aMCI                | n = 91                       | NC - 74 (7)                 | NC                                                                | Neuropsychological<br>assessments (including<br>interview) included<br>standardized cognitive tasks<br>examining intellectual ability,<br>attention, processing speed,<br>language, visuospatial<br>abilities, memory, and<br>executive function | BHA<br>(includes four subtests<br>based on existing clinical<br>and experimental tasks and<br>a demographic and health<br>questionnaire)                                                                                                                                                                           | Memory and<br>executive attention                                                                                                                                                                                                                 | Paper-based<br>digital solutions | Sensitivity 0.57<br>Specificity 0.82 |
|                             |                     | NC (n = 40)<br>aMCI (n = 51) | aMCI - 75 (6)               | F 53%<br>aMCI<br>F 49%                                            |                                                                                                                                                                                                                                                  |                                                                                                                                                                                                                                                                                                                    |                                                                                                                                                                                                                                                   |                                  |                                      |
| Cheah et<br>al. (2022)      | MCI                 | n = 118                      | MCI - 68 (6)<br>HC - 63 (6) | MCI<br>F 31 (53%)<br>M 28 (47%)<br>HC<br>F 33 (56%)<br>M 26 (44%) | Comprehensive<br>neuropsychological<br>assessment, including<br>measurements                                                                                                                                                                     | Digital Screening System for<br>Alzheimer Disease Based on<br>a Neuropsychological Test<br>and a Convolutional Neural<br>Network<br>(proposes a data-driven<br>convolutional neural<br>network architecture<br>through transfer learning<br>and deep learning methods<br>for participants' cognitive<br>screening) | Visuospatial<br>constructional<br>capabilities and<br>visual memory<br>function; cognitive<br>functions, such as<br>visuospatial abilities,<br>visual episodic<br>memory,<br>organization skills,<br>attention, and<br>visuomotor<br>coordination | Innovative<br>digital solutions  | Sensitivity 0.85<br>Specificity 0.90 |

#### Target condition and participants

AD: Alzheimer's Disease; aMCI: amnesic Mild Cognitive Impairment; CH: Cognitively Healthy; CI: Cognitive Impairment; CN: Cognitively Normal; CON: Normal Control Subjects; D: Dementia; HC: Healthy Control; HV: Healthy Volunteers; I: Impairment; MCD: Mild Cognitive Dementia; MCI: Mild Cognitive Impairment; MI: Mildly Impaired; naMCI: non-amnesic Mild Cognitive Impairment; NC: Normal Controls / Normal Cognition; SCD: Subjective Cognitive Decline; SCI: Subtle Cognitive Impairment; TP: Typical Performance; unI: Unimpaired.

#### Reference Standard

ADAS-Cog: Alzheimer's Disease Assessment Scale Cognitive; ADL: Activities of Daily Living; BDRS: Blessed Dementia Rating Scale; CDR: Clinical Dementia Rating Scale; CERAD: Consortium to Establish a Registry for Alzheimer's Disease; CMMSE: Cantonese version of the mini-mental state examination; CVFT: Category Verbal Fluency Test; DSM: Diagnostic and Statistical Manual of Mental Disorders; EEG: Electroencephalogram; GDS: Geriatric Depression Scale; HVL: Hopkins Verbal Learning Test; MMSE: Mini Mental State Examination; MoCA: Montreal Cognitive Assessment; MRI: Magnetic resonance imaging; NBACE: Neuropsychological Battery of Fundació ACE; PACC: Preclinical Alzheimer Cognitive Composite; RAVLT: Rey Auditory Verbal Learning Task; SAGE: Self-Administered Gerocognitive Examination; TMT: Trail Making Test; WAIS: Wechsler Adult Intelligence Scale; WCST: Wisconsin Card Sort Test; SLUMS: St. Louis University Mental Status.

#### Index Test

BHA: Brian Health Assessment; CAMCI: Computerized Assessment of Mild Cognitive Impairment; CANS-MCI: Computer-Administered Neuropsychological Screen for Mild Cognitive Impairment; cCOG: Computerized Cognitive Test; CCS: Battery of Computerised Cognitive Screening; CoCoSc: Computerized Cognitive Screen; CST: The Computerized Self Test; DRA: Dementia Risk Assessment; eSAGE: Digitally translated Self-Administered Gerocognitive Examination; FACEmemory®: Face-Name Associative Memory Exam; HK-VMT: Hong Kong – Vigilance and Memory Test; ICA: Integrated Cognitive Assessment; MITS-L: Miami Test of Semantic Interference and Learning; MoCA-CC: Computerized tool for the Chinese version of the MoCA; MTX: MemTrax test; UX-TMT: User Experience-Trail Making Test; VSP: VR game-based test: Virtual Supermarket Program.

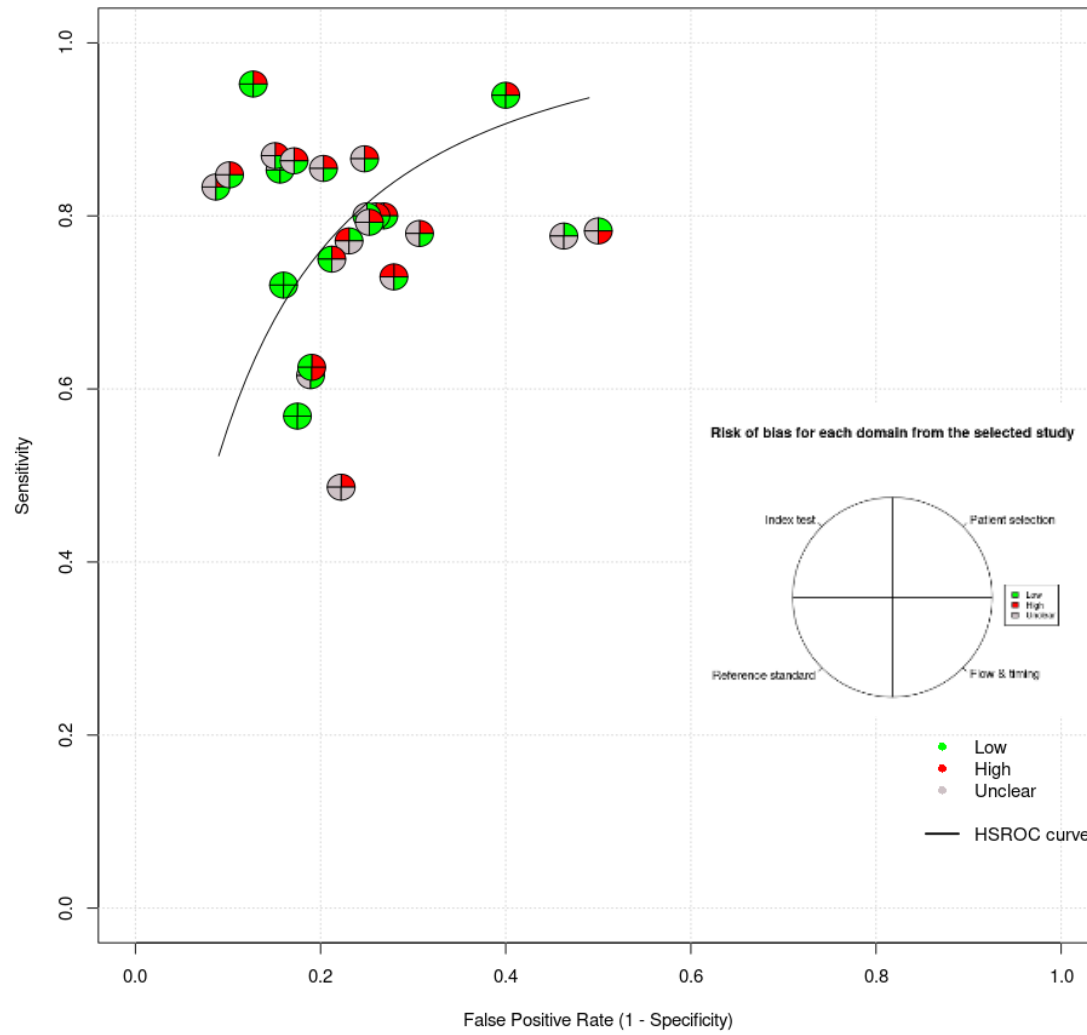

**Figure S1.** Random-effects meta-analysis - summary ROC (SROC) curve with quality assessment obtained by the QUADAS-2 tool (risk of bias).

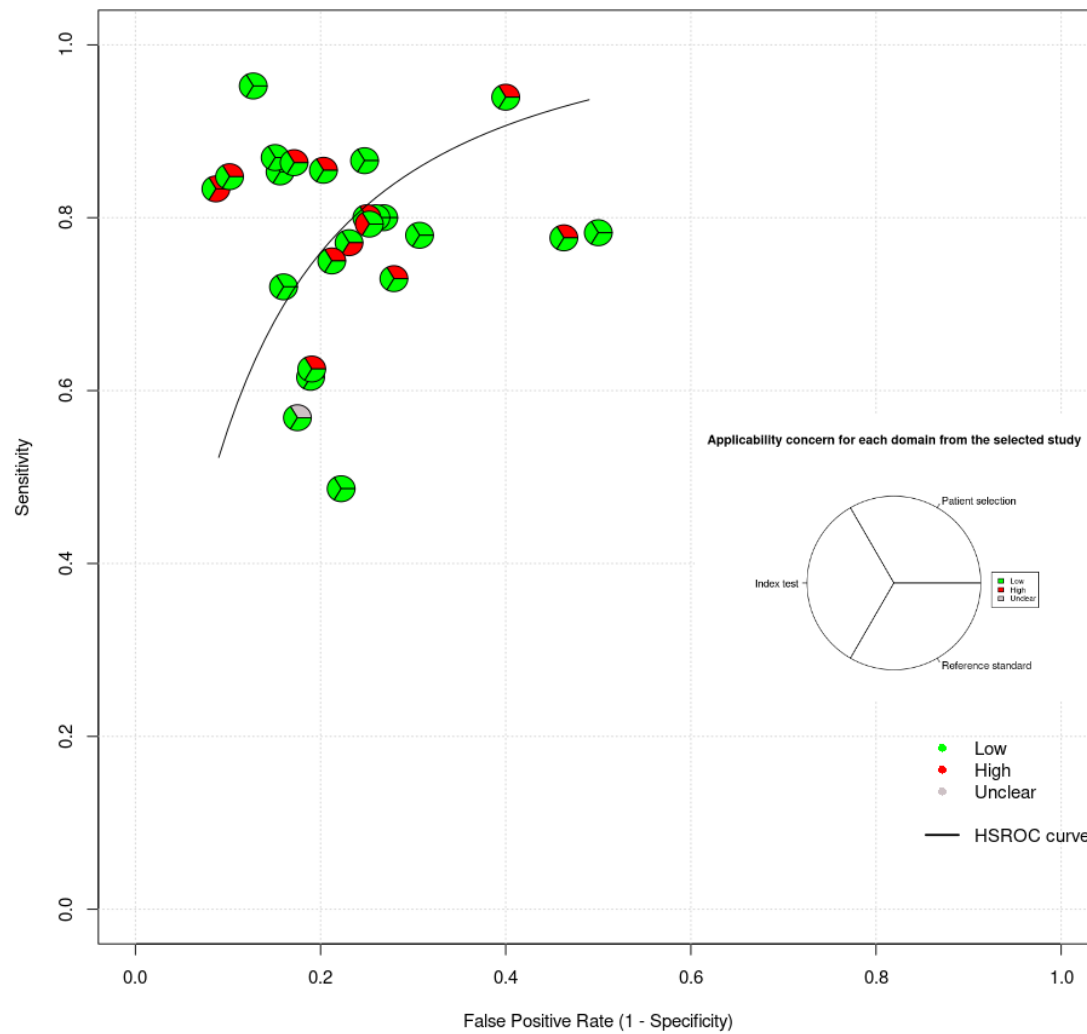

**Figure S2.** Random-effects meta-analysis - summary ROC (SROC) curve with Quality Assessment obtained by the QUADAS-2 tool (applicability concerns).
